# Supplementary material for: Atopic Dermatitis Complicated by Recurrent Eczema Herpeticum Is Characterized by Multiple, Concurrent Epidermal Inflammatory Endotypes
Source: PubMed Central journal article supplement — JID Innov. 2024 Apr 2;4(4):100279. doi: 10.1016/j.xjidi.2024.100279 (PMC11239700; doi:10.1016/j.xjidi.2024.100279), 2024-04-02
Supplement: mmc7.pdf [file mmc7.pdf]

**FIGURE S2**

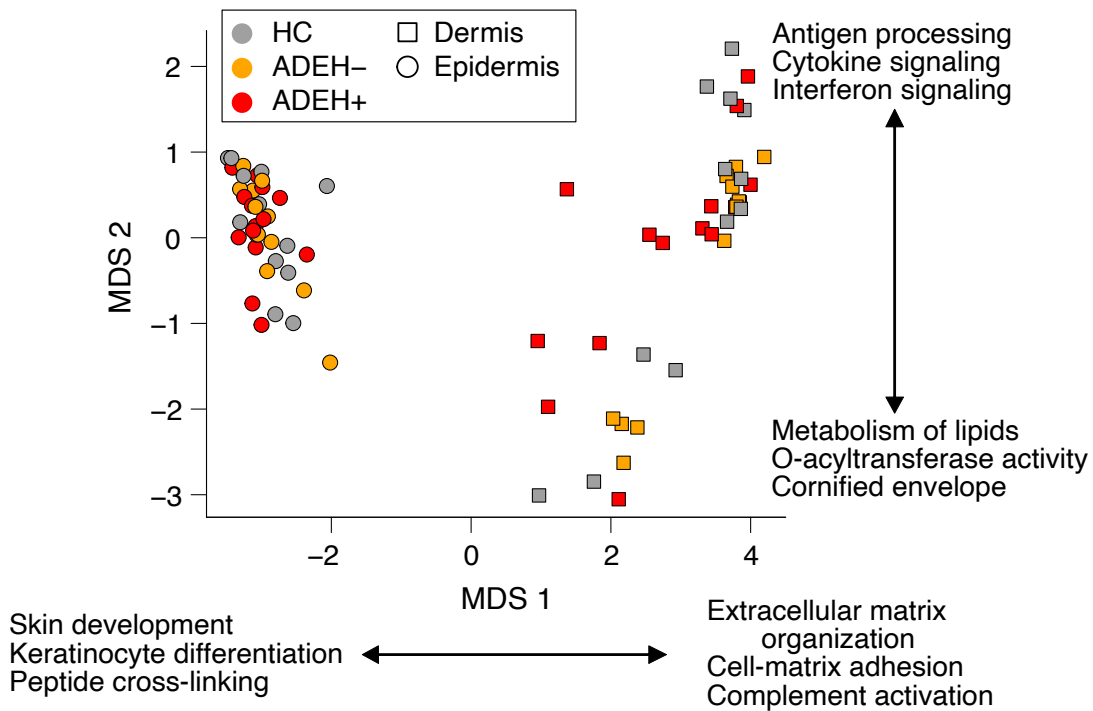

**Figure S2: Broad overview of transcriptome variation within non-lesional dermal and epidermal skin from AD subjects with and without EH.** Multi-dimensional scaling (MDS) visualization of transcriptomic variation across *in vivo* dermal and epidermal samples. Point colors denote disease status (grey = healthy control, orange = ADEH<sup>-</sup>, red = ADEH<sup>+</sup>) and point shapes denote different tissue types (square = dermis, circle = epidermis). Enriched pathways for the most highly weighted genes for each axis extreme (low or high) of MDS dimensions 1 and 2 are given.
