# Supplementary material for: Atopic Dermatitis Complicated by Recurrent Eczema Herpeticum Is Characterized by Multiple, Concurrent Epidermal Inflammatory Endotypes
Source: PubMed Central journal article supplement — JID Innov. 2024 Apr 2;4(4):100279. doi: 10.1016/j.xjidi.2024.100279 (PMC11239700; doi:10.1016/j.xjidi.2024.100279), 2024-04-02
Supplement: mmc8.pdf [file mmc8.pdf]

**FIGURE S3**

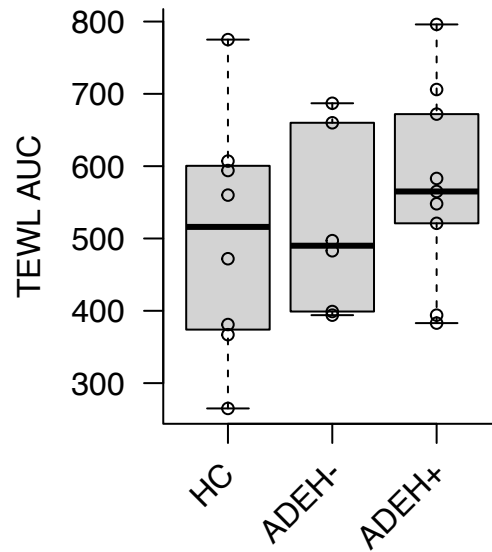

**Figure S3: Differences in TEWL measures of skin barrier integrity among HC, ADEH-, and ADEH<sup>+</sup> patients.** Box plots showing cumulative transepidermal water loss (TEWL) area under the curve (AUC) measures based on 20 measures taken at baseline, and after 5, 10, 15, and 20 tape strips. TEWL measures were collected at 1-year follow-ups on a subset of patients (N=23).
